# Supplementary material for: Long-term ecosystem nitrogen limitation from foliar δ15N data and a land surface model
Source: bioRxiv or medRxiv preprint supplement (doi:10.1101/2021.07.16.452605), 2021-07-16
Supplement: Supplementary file [file media-1.pdf]

# Supporting information: Long-term ecosystem nitrogen limitation from foliar $\delta^{15}\text{N}$ data and a land surface model

Silvia Caldararu<sup>1\*</sup>, Tea Thum<sup>1,2</sup>, Lin Yu<sup>1,3</sup>, Melanie Kern<sup>1,4</sup>, Richard Nair<sup>1</sup>, Sönke Zaehle<sup>1,5</sup>

1 Max Planck Institute for Biogeochemistry, Jena, Germany

2 The Finnish Meteorological Institute, Helsinki, Finland

3 Centre for Environmental and Climate Science, Lund University, Lund, Sweden

4 TUM School of Life Sciences, Freising, Germany

5 Michael Stifel Center Jena for Data-driven and Simulation Science, Jena, Germany

\*Corresponding author Silvia Caldararu, email [scaldra@bgc-jena.mpg.de](mailto:scaldra@bgc-jena.mpg.de)

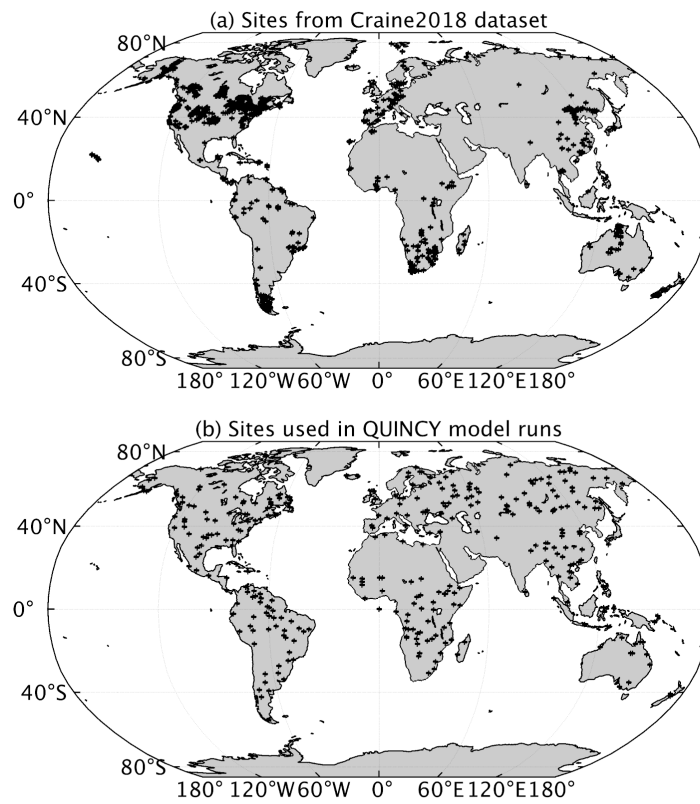

Figure S1 - Geographical distribution of (a) sites from the Craine2018 dataset and (b) sites used for all QUINCY model scenarios.

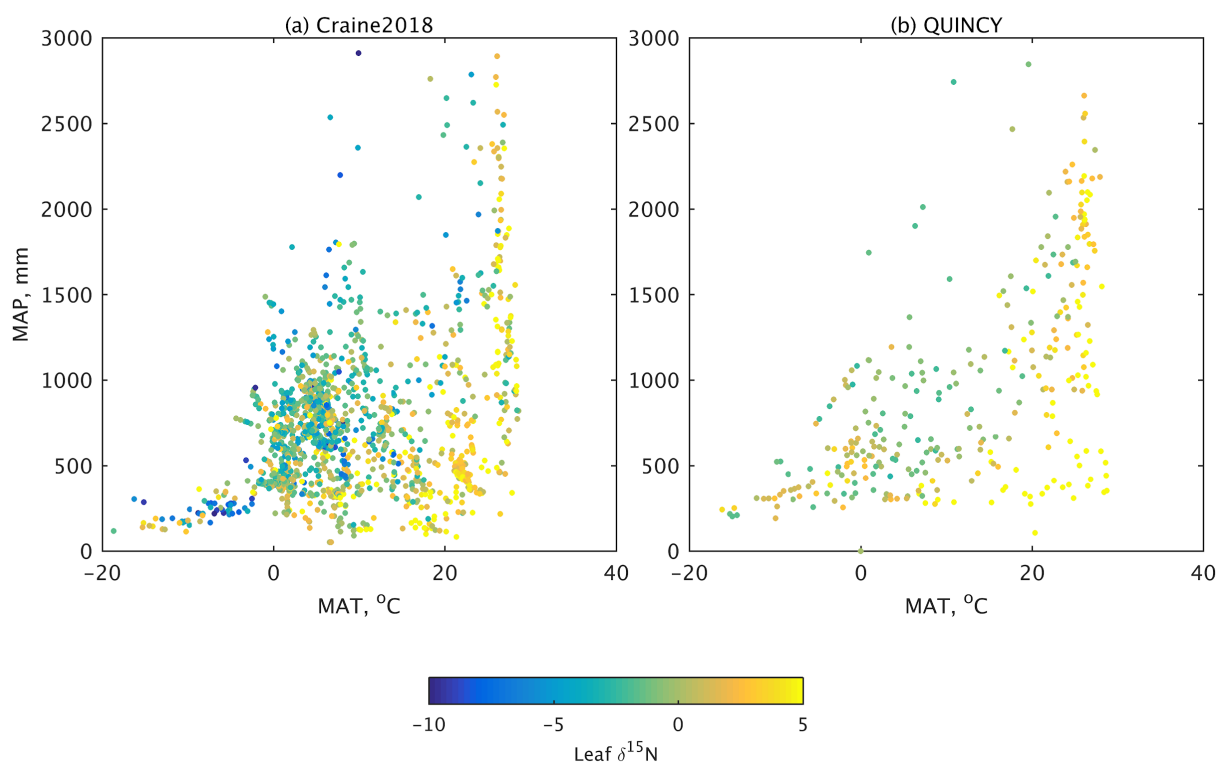

Figure S2 - Distribution of absolute values of leaf  $\delta^{15}\text{N}$  across climate regions for (a) the Craine 2018 dataset and (b) the QUINCY model.

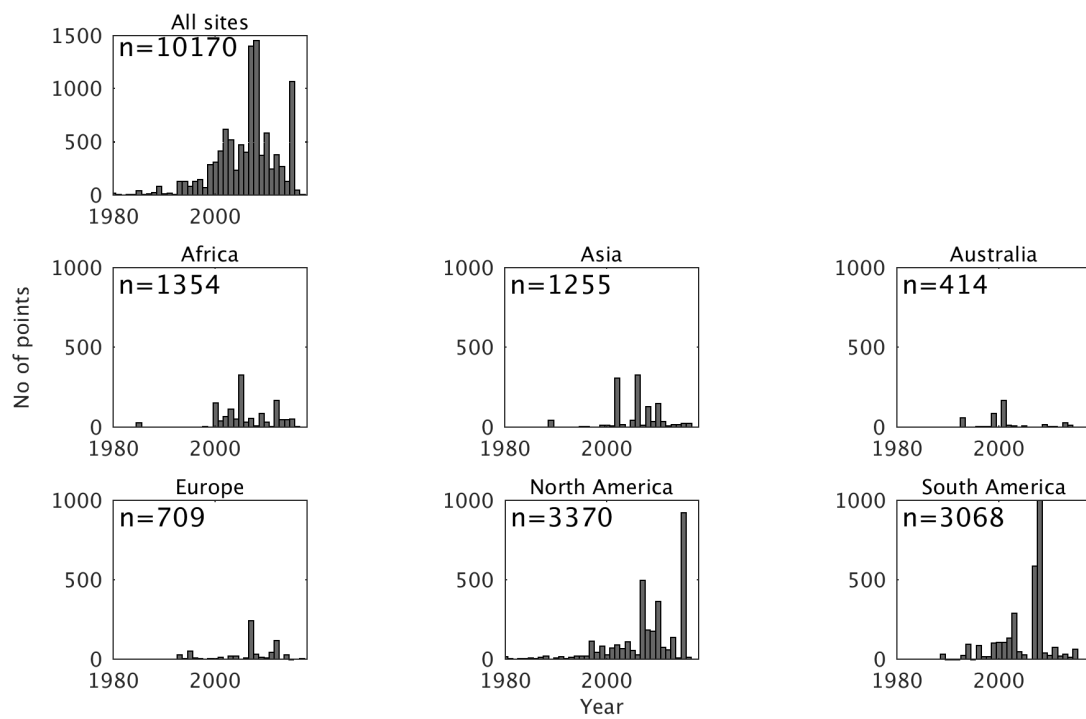

Figure S3 - Temporal distribution of data points in the Craine2018 dataset.

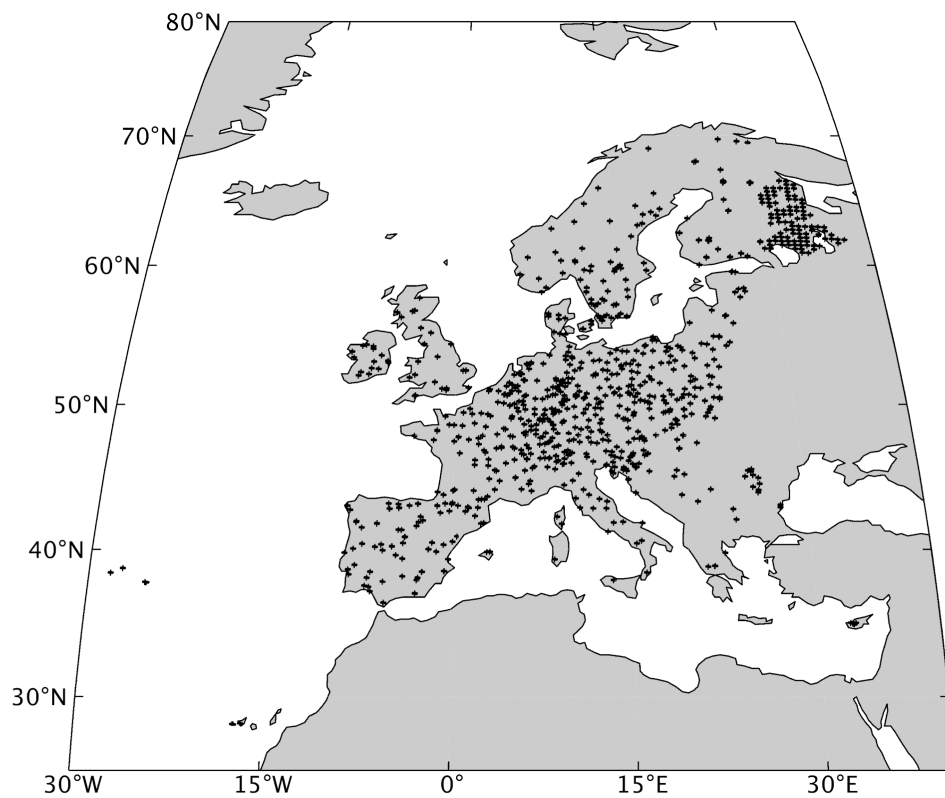

Figure S4 - Geographic distribution of measurement plots in the ICP Forests dataset.

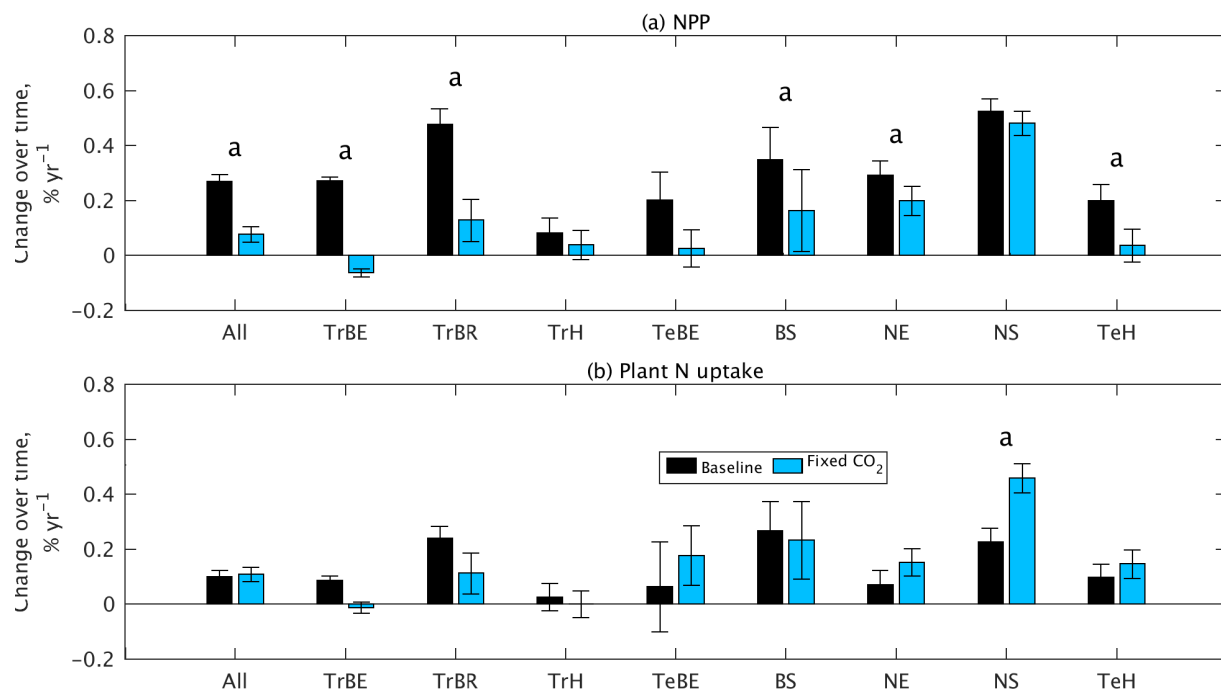

Figure S5 - Plant growth change from 1980-2018 across all PFTs due to the increase in atmospheric CO<sub>2</sub> as predicted by the model. Relative change in (a) annual net primary productivity (NPP), (b) plant nitrogen uptake. Error bars represent standard error across sites. PFTs for which the model predicts a significant difference between the baseline and fixed CO<sub>2</sub> runs are indicated with 'a'; significance computed with Wilcoxon rank sum test at  $p < 0.05$ . PFT abbreviations: TrBE tropical broadleaf evergreen, TrBR tropical broadleaf rain-green, TrH, C4 grassland, TeBE temperate broadleaf evergreen, BS broadleaf seasonal, NE needleleaf evergreen, NS needleleaf seasonal, TeH C3 grassland.

Table S1 - Plant functional type (PFT) used in the QUINCY model

| Abbreviation | Description                                        |
|--------------|----------------------------------------------------|
| TrBE         | Tropical broadleaf evergreen                       |
| TrBR         | (Tropical)broadleaf rain deciduous                 |
| TeBE         | Temperate broadleaf evergreen                      |
| BS           | (Temperate and boreal) broadleaf winter deciduous  |
| NE           | (Temperate and boreal) needleleaf evergreen        |
| NS           | (Temperate and boreal) needleleaf winter deciduous |
| TeH          | C3 grass                                           |
| TrH          | C4 grass                                           |

Table S2 - Nitrogen isotopic fractionation ( $\epsilon$ ) values in QUINCY, as described in (Thum *et al.*, 2019) adapted from (Robinson, 2001)

| Process                          | Value, ‰ |
|----------------------------------|----------|
| Microbial NH <sub>4</sub> uptake | 17.0     |
| Plant NH <sub>4</sub> uptake     | 13,5     |
| Plant NO <sub>4</sub> uptake     | 9.5      |
| Nitrification                    | 47.5     |
| NO <sub>3</sub> production       | 25.0     |
| Denitrification                  | 31.0     |
| NH <sub>4</sub> production       | 2.5      |
| Biological nitrogen fixation     | 3.0      |

Table S3 - Number of sites within each PFT for each dataset used and in the QUINCY model sites

| PFT  | QUINCY | Craine2018 | ICP Forests |
|------|--------|------------|-------------|
| TrBE | 48     | 3470       | -           |
| TrBR | 10     | 1432       | -           |
| TeBE | 8      | 364        | 33          |
| BS   | 28     | 1492       | 324         |
| NE   | 54     | 396        | 613         |
| NS   | 9      | 11         | 4           |
| TeH  | 74     | 2273       | -           |
| TrH  | 80     | 743        | -           |

Robinson, D. (2001) ' $\delta^{15}\text{N}$  as an integrator of the nitrogen cycle', *Trends in ecology & evolution*, 16(3), pp. 153–162. doi: 10.1016/S0169-5347(00)02098-X.

Thum, T. *et al.* (2019) 'A new model of the coupled carbon, nitrogen, and phosphorus cycles in the terrestrial biosphere (QUINCY v1.0; revision 1996)', *Geoscientific Model Development*, 12(11), pp. 4781–4802. doi: 10.5194/gmd-12-4781-2019.
